# Supplementary material for: Predictive value of RAD51 on the survival and drug responsiveness of ovarian cancer
Source: PubMed Central journal article supplement (PMC8097773; doi:10.1186/s12935-021-01953-5), 2021-05-05

**a**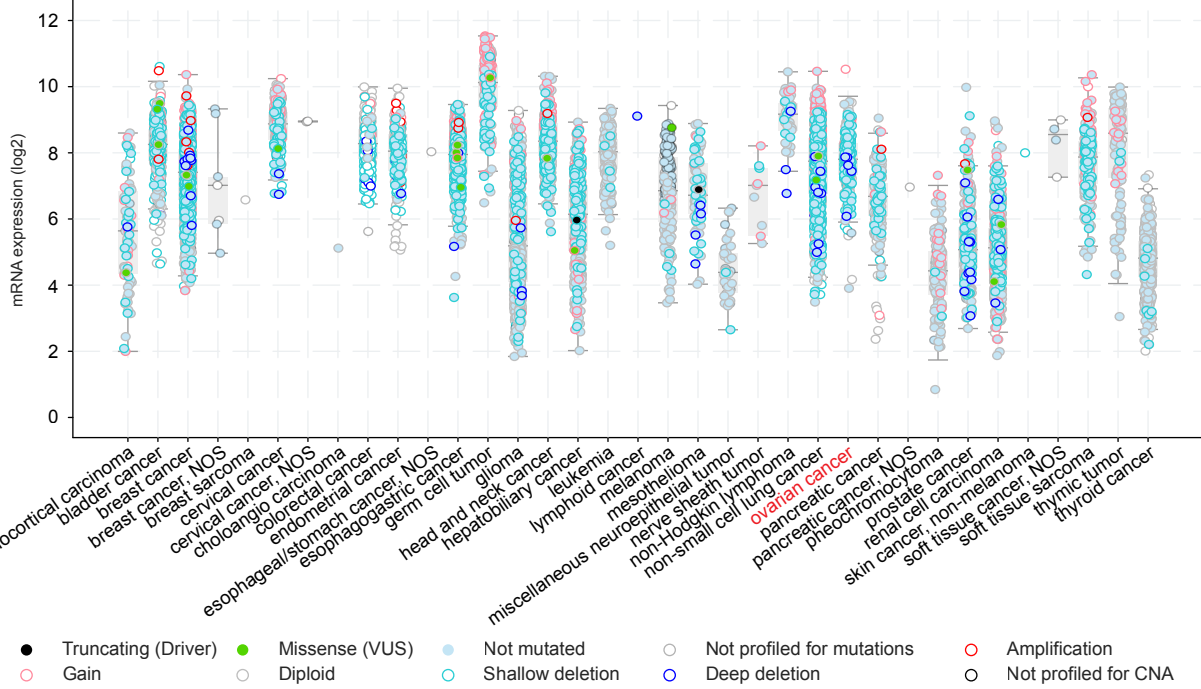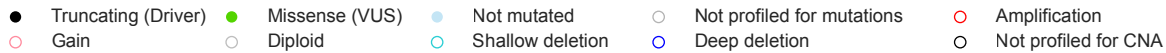**b**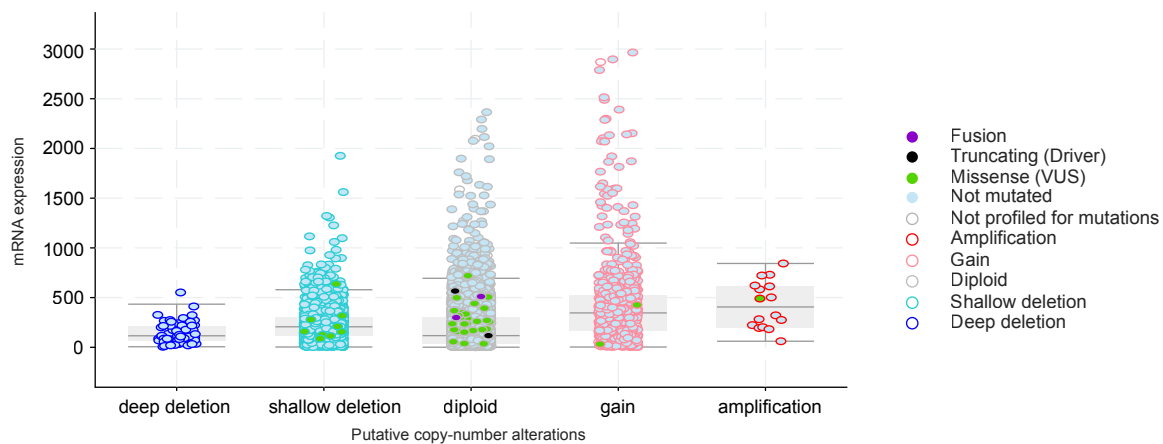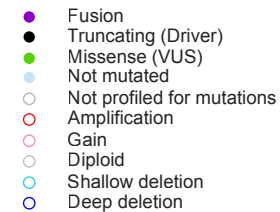

Supplement: 12935_2021_1953_MOESM2_ESM.pdf [file 12935_2021_1953_MOESM2_ESM.pdf]
